# Supplementary material for: Expression of EMT-Related Genes CAMK2N1 and WNT5A is increased in Locally Invasive and Metastatic Prostate Cancer
Source: PubMed Central journal article supplement (PMC6856586; doi:10.7150/jca.34564), 2019-10-15

**Table S1- Characterization of the 93 potential EMT-related genes selected for this study.**

| Gene Symbol    | Location     | Related Functions/Process*                                                                                |
|----------------|--------------|-----------------------------------------------------------------------------------------------------------|
| <i>AHNAK</i>   | 11q12.2      | Cell differentiation                                                                                      |
| <i>AKT1</i>    | 14q32.32     | Cell differentiation and cell proliferation                                                               |
| <i>BMP1</i>    | 8p21.3       | Cell differentiation, extracellular matrix organization and TGF $\beta$ pathway                           |
| <i>BMP7</i>    | 20q13        | Cell differentiation, cell proliferation and TGF $\beta$ pathway                                          |
| <i>CALD1</i>   | 7q33         | Cell migration                                                                                            |
| <i>CAMK2N1</i> | 1p36.12      | Calcium-dependent protein kinase inhibition                                                               |
| <i>CAV2</i>    | 7q31.1       | Cell proliferation and cell migration                                                                     |
| <i>CD44</i>    | 11p13        | Cell adhesion and a stem cell marker                                                                      |
| <i>CDH1</i>    | 16q22.1      | Cell adhesion                                                                                             |
| <i>CDH2</i>    | 18q11.2      | Cell adhesion                                                                                             |
| <i>CDH3</i>    | 16q22.1      | Cell adhesion                                                                                             |
| <i>CDH11</i>   | 16q21        | Cell adhesion                                                                                             |
| <i>COL1A2</i>  | 7q22.1       | Extracellular matrix organization                                                                         |
| <i>COL3A1</i>  | 2q31         | Extracellular matrix organization and TGF $\beta$ pathway                                                 |
| <i>COL5A2</i>  | 2q14-q32     | Extracellular matrix organization                                                                         |
| <i>CTNNB1</i>  | 3p21         | Cell morphogenesis, cell proliferation, cell adhesion, cell-extracellular matrix adhesion and WNT pathway |
| <i>DAB2IP</i>  | 9q33.1-q33.3 | Cell proliferation, cell migrations and Wnt pathway                                                       |
| <i>DSC2</i>    | 18q12.1      | Cell adhesion                                                                                             |
| <i>DSP</i>     | 6p24         | Cell adhesion, cytoskeleton organization                                                                  |
| <i>EGFR</i>    | 7p12         | Cell proliferation, cell migration and cell adhesion                                                      |
| <i>ERBB3</i>   | 12q13        | Cell differentiation, cell proliferation and cell adhesion                                                |
| <i>F11R</i>    | 1q21.2-q21.3 | Cell differentiation, cell adhesion and TGF pathway                                                       |
| <i>FGFBP1</i>  | 4p15.32      | Cell differentiation, cell proliferation and cell migration                                               |
| <i>FN1</i>     | 2q34         | Cell migration, cell adhesion and cell morphogenesis                                                      |
| <i>FOXC2</i>   | 16q24.1      | Cell differentiation, cell proliferation, cell adhesion and Notch pathway                                 |
| <i>FZD7</i>    | 2q33         | Cell differentiation, stem cell division, stem cell maintenance and WNT pathway                           |
| <i>GNG11</i>   | 7q21         | Modulation/transduction of transmembrane signaling                                                        |
| <i>GSC</i>     | 14q32.1      | Cell differentiation and Wnt pathway                                                                      |
| <i>GSK3B</i>   | 3q13.3       | Cell proliferation, cell migration and WNT pathway                                                        |
| <i>IGFBP4</i>  | 17q12-q21.1  | Cell proliferation                                                                                        |
| <i>IL1RN</i>   | 2q14.2       | Cell proliferation and cell adhesion                                                                      |
| <i>ILK</i>     | 11p15.4      | Cell proliferation, cell adhesion, cell-extracellular matrix, cell migration and Wnt pathway              |
| <i>ITGA5</i>   | 12q11-q13    | Cell adhesion                                                                                             |
| <i>ITGAV</i>   | 2q31-q32     | Cell proliferation, cell adhesion, cell-extracellular matrix adhesion and cell migration                  |
| Gene Symbol    | Location     | Related Functions/Process*                                                                                |

|                    |                 |                                                                                                                  |
|--------------------|-----------------|------------------------------------------------------------------------------------------------------------------|
| <i>ITGB1</i>       | 10p11.2         | Cell adhesion, cell-extracellular matrix adhesion and cell migration                                             |
| <i>JAG1</i>        | 20p12.1-p11.23  | Cell differentiation, cell morphogenesis and Notch pathway                                                       |
| <i>KRT7</i>        | 12q13.13        | Cytoskeleton organization                                                                                        |
| <i>KRT14</i>       | 17q12-q21       | Cell differentiation, cell adhesion and cytoskeleton organization                                                |
| <i>KRT19</i>       | 17q21.2         | Cell differentiation and cytoskeleton organization                                                               |
| <i>MAP1B</i>       | 5q13            | Microtubule organization                                                                                         |
| <i>MITF</i>        | 3p14.2-p14.1    | Cell differentiation                                                                                             |
| <i>MMP2</i>        | 16q13-q21       | Extracellular matrix degradation and organization                                                                |
| <i>MMP3</i>        | 11q22.3         | Extracellular matrix degradation and organization                                                                |
| <i>MMP9</i>        | 20q11.2-q13.1   | Extracellular matrix degradation and organization, cell-extracellular matrix adhesion and cell proliferation     |
| <i>MSN</i>         | Xq11.1          | Cell migration                                                                                                   |
| <i>MST1R</i>       | 3p21.3          | Cell differentiation, cell proliferation and cell migration                                                      |
| <i>NKX3-1</i>      | 8p21.2          | Cell proliferation                                                                                               |
| <i>NODAL</i>       | 10q22.1         | Cell differentiation, cell proliferation, cell migration and TGF pathway                                         |
| <i>NOTCH1</i>      | 9q34.3          | Cell differentiation, cell morphogenesis and Notch pathway                                                       |
| <i>NUDT13</i>      | 10q22.1         |                                                                                                                  |
| <i>OCN</i>         | 5q13.1          | Cell proliferation and cell adhesion                                                                             |
| <i>PDGFRB</i>      | 5q33.1          | Cell proliferation and cell migration                                                                            |
| <i>PLEK2</i>       | 14q23.3         | Cytoskeleton organization                                                                                        |
| <i>POU5F1</i>      | 6p21.31         | Stem cell maintenance and Wnt pathway                                                                            |
| <i>PROM1</i>       | 4p15.32         | Cell differentiation, Stem cell maintenance                                                                      |
| <i>PTK2</i>        | 8q24.3          | Cell proliferation, extracellular matrix organization, cell adhesion and cell migration                          |
| <i>PTP4A1</i>      | 6q12            | Cell differentiation, cell proliferation and cell migration                                                      |
| <i>RAC1</i>        | 7p22            | Cell morphogenesis, cell adhesion, cell-extracellular matrix adhesion, cytoskeleton organization and Wnt pathway |
| <i>RARB</i>        | 3p24.2          | Cell differentiation and cell proliferation                                                                      |
| <i>RASSF1</i>      | 3p21.3          | Cell proliferation and RAS pathway                                                                               |
| <i>RGS2</i>        | 1q31            | Cell differentiation and cell proliferation                                                                      |
| <i>SERPINE1</i>    | 7q21.3-q22      | Cell adhesion and cell migration                                                                                 |
| <i>SFRP1</i>       | 8p11.21         | Wnt pathway                                                                                                      |
| <i>SIP1</i>        | 14q13           | Transcription factor                                                                                             |
| <i>SMAD2</i>       | 18q21.1         | Cell differentiation, cell proliferation, cell morphogenesis and TGF $\beta$ pathway                             |
| <i>SMAD4</i>       | 18q21.1         | Cell differentiation, cell morphogenesis and TGF $\beta$ pathway                                                 |
| <i>SNAI1</i>       | 20q13.2         | Cell differentiation, cell morphogenesis, cell migration and Notch pathway                                       |
| <b>Gene Symbol</b> | <b>Location</b> | <b>Related Functions/Process*</b>                                                                                |
| <i>SNAI2</i>       | 8q11            | Cell differentiation, stem cell proliferation, Notch pathway and Wnt pathway                                     |
| <i>SNAI3</i>       | 16q24.3         | Transcription factor                                                                                             |
| <i>SOX10</i>       | 22q13.1         | Cell differentiation, cell proliferation, cell morphogenesis and Wnt pathway                                     |

|                 |               |                                                                                                                     |
|-----------------|---------------|---------------------------------------------------------------------------------------------------------------------|
| <i>SPARC</i>    | 5q31.3-q32    | Cell morphogenesis, Extracellular matrix organization and cell migration                                            |
| <i>SPP1</i>     | 4q22.1        | Cell adhesion and cell-extracellular matrix adhesion                                                                |
| <i>STAT3</i>    | 17q21.31      | Cell proliferation, cell migration and Notch pathway                                                                |
| <i>STEAP1</i>   | 7q21          | Cell adhesion                                                                                                       |
| <i>TCF3</i>     | 19p13.3       | Cell differentiation, cell proliferation and transcription factor                                                   |
| <i>TCF4</i>     | 18q21.1       | Cell differentiation and transcription factor                                                                       |
| <i>TFPI2</i>    | 7q22          | Extracellular matrix component                                                                                      |
| <i>TGFB1</i>    | 19q13.1       | Cell proliferation, cell migration, cell adhesion and TGF $\beta$ pathway                                           |
| <i>TGFB2</i>    | 1q41          | Cell differentiation, cell proliferation, cell morphogenesis, cell migration, cell adhesion and TGF $\beta$ pathway |
| <i>TGFB3</i>    | 14q24         | Cell differentiation, cell proliferation, cell adhesion and TGF $\beta$ pathway                                     |
| <i>TIMP1</i>    | Xp11.3-p11.23 | Cell proliferation, cell migration, cell adhesion and TGF $\beta$ pathway (inhibitor of MMP's)                      |
| <i>TMEFF1</i>   | 9q31          | Cell differentiation                                                                                                |
| <i>TMEM132A</i> | 11q12.2       | Cell differentiation                                                                                                |
| <i>TSPAN13</i>  | 7p21.1        | Cell migration                                                                                                      |
| <i>TWIST1</i>   | 7p21.2        | Cell differentiation and transcription factor                                                                       |
| <i>VCAN</i>     | 5q14.3        | Cell proliferation, extracellular matrix component, cell adhesion and migration                                     |
| <i>VIM</i>      | 10p13         | Cell migration and cytoskeleton organization                                                                        |
| <i>VPS13A</i>   | 9q21          | Proteins transport                                                                                                  |
| <i>WNT11</i>    | 11q13.5       | Cell differentiation, cell proliferation, cell migration and WNT pathway                                            |
| <i>WNT5A</i>    | 3p21-p14      | Cell differentiation and WNT pathway                                                                                |
| <i>WNT5B</i>    | 12p13.3       | Cell differentiation, cell migration and WNT pathway                                                                |
| <i>ZEB1</i>     | 10p11.2       | Cell differentiation, cell proliferation and transcription factor                                                   |
| <i>ZEB2</i>     | 2q22.3        | Transcription factor                                                                                                |

\* Based on information available in <http://www.ncbi.nlm.nih.gov/>

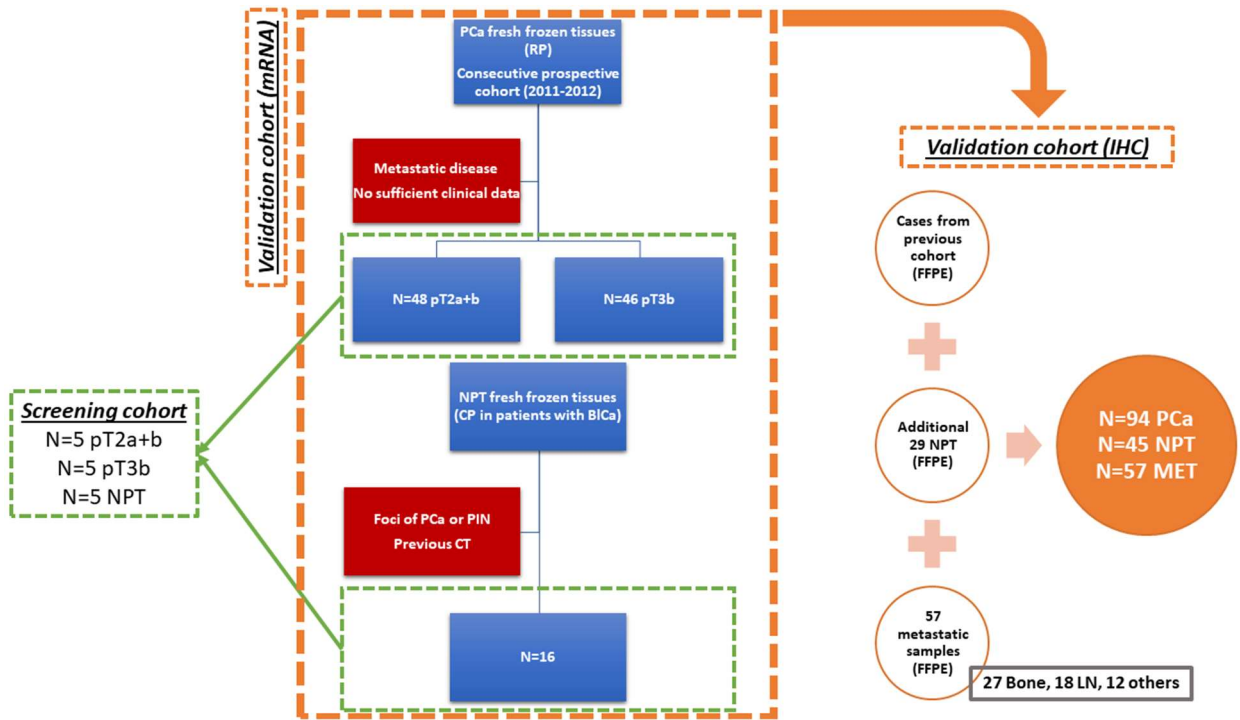

Supplement: jcav10p5915s1.pdf [file jcav10p5915s1.pdf]
